# Supplementary material
Source: MDPI journal article supplement (https://www.mdpi.com/2305-7084/5/3/35)
Supplement: s1 [file s1 › ChemEngineering-1219814-supplementary.pdf]

# Electronic Supplementary Materials (ESM)

## Coagulated Mineral Adsorbents for Dye Removal, and their Process Intensification Using an Agitated Tubular Reactor (ATR)

Alastair S. Tonge<sup>1, 2 \*</sup>, David Harbottle<sup>1</sup>, Simon Casarin<sup>3</sup>, Monika Zervaki<sup>3</sup>, Christel Careme<sup>3</sup>, Timothy N. Hunter<sup>1,\*</sup>

<sup>1</sup>School of Chemical and Process Engineering, University of Leeds, Leeds LS2 9JT, U.K.

<sup>2</sup>United Utilities, Haweswater House, Lingley Mere Business Park, Warrington WA5 3LP, U.K.

<sup>3</sup>Imerys, 2 Place Edouard Bouillères, Toulouse 31036, France.

\*Correspondence: [alastair.tonge@uuplc.co.uk](mailto:alastair.tonge@uuplc.co.uk); [t.n.hunter@leeds.ac.uk](mailto:t.n.hunter@leeds.ac.uk); Tel: +44 113 343 2790

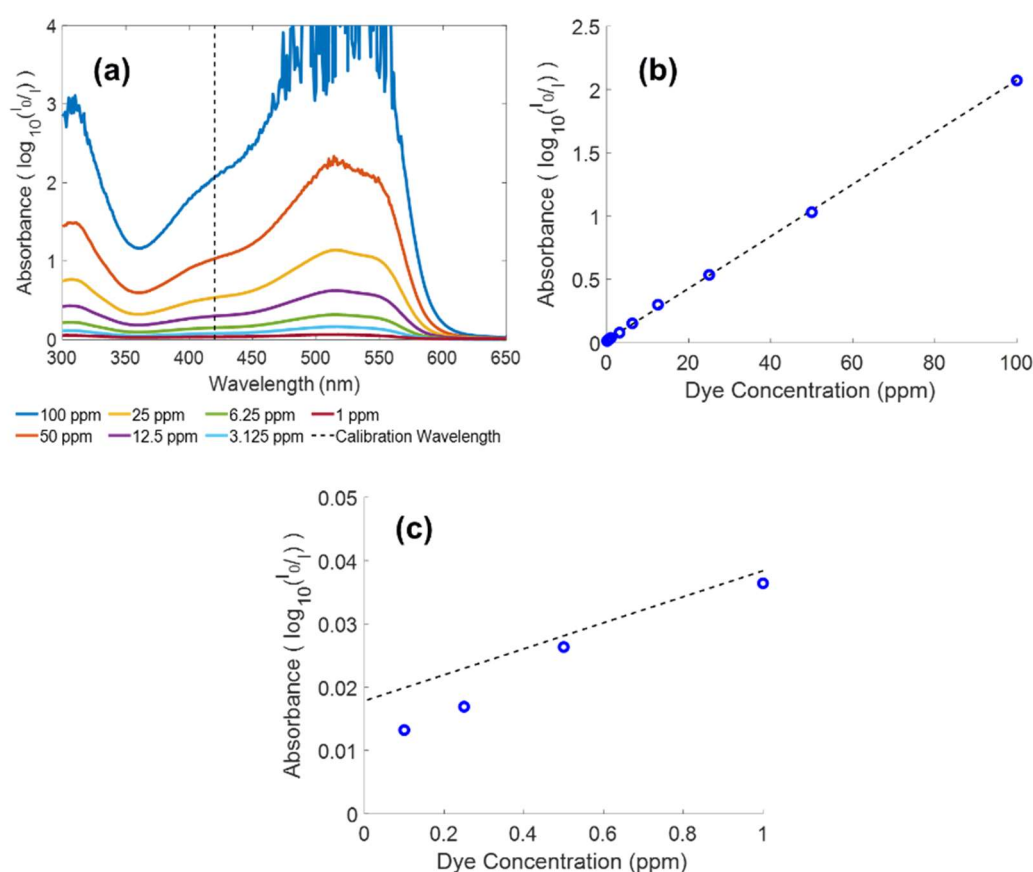

Figure S1: a) UV-Vis spectrum data (200-800 nm) for azo dye at 1-100 ppm, with b) concentration calibration & c) low-concentration region showing the lower limit of detection (0.5 ppm).

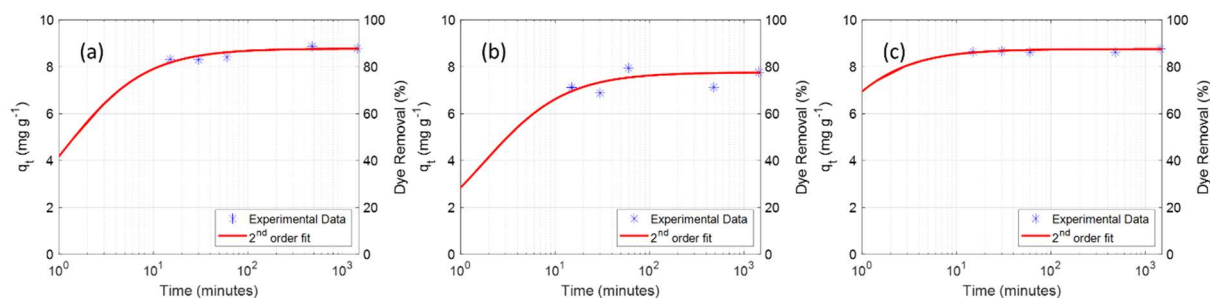

**Figure S2:** Kinetics of dye uptake with (a) modified bentonite, (b) talc and (c) calcium carbonate using 100 ppm dye solutions over the full measurement period of 1500 min on a logarithmic time scale. Data shown in terms of relative adsorption capacity,  $q_t$  (in  $\text{mg g}^{-1}$ ), on left-hand axes, and dye removal percent on right-hand axes.

**Table S1:** Standard deviation in  $q_t$  ( $\text{mg g}^{-1}$ ) for dye uptake kinetic data.

|                          | Time (minutes) |       |       |       |       |
|--------------------------|----------------|-------|-------|-------|-------|
|                          | 15             | 30    | 60    | 480   | 1440  |
| <b>Bentonite</b>         | 0.003          | 0.001 | 0.014 | 0.061 | 0.053 |
| <b>Talc</b>              | 0.126          | 0.162 | 0.040 | 0.131 | 0.056 |
| <b>Kaolin</b>            | 0.339          | 0.334 | 0.231 | 0.312 | 0.241 |
| <b>Calcium Carbonate</b> | 0.039          | 0.041 | 0.037 | 0.036 | 0.051 |
| <b>Zeolite</b>           | 0.396          | 0.406 | 0.395 | 0.415 | 0.334 |

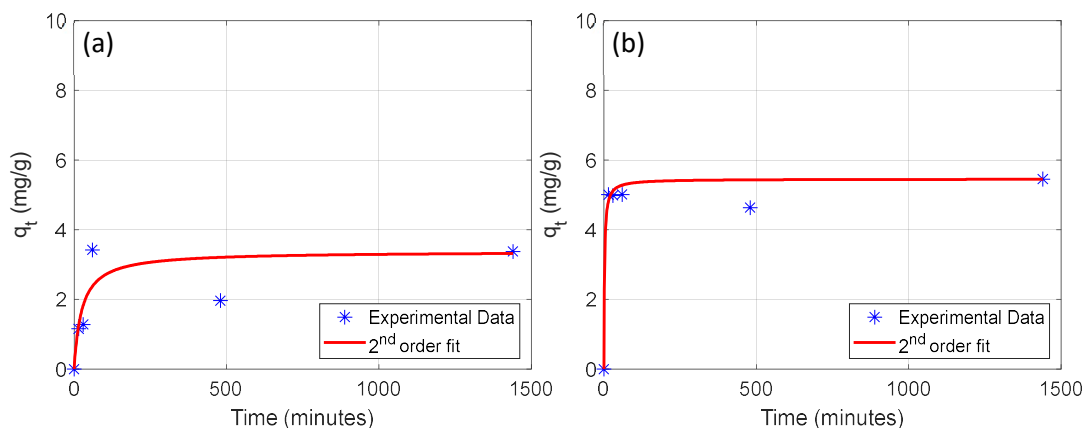

**Figure S3:** Kinetic adsorption results for dye uptake with (a) kaolin and (b) zeolite, in terms of adsorption capacity,  $q_t$ .

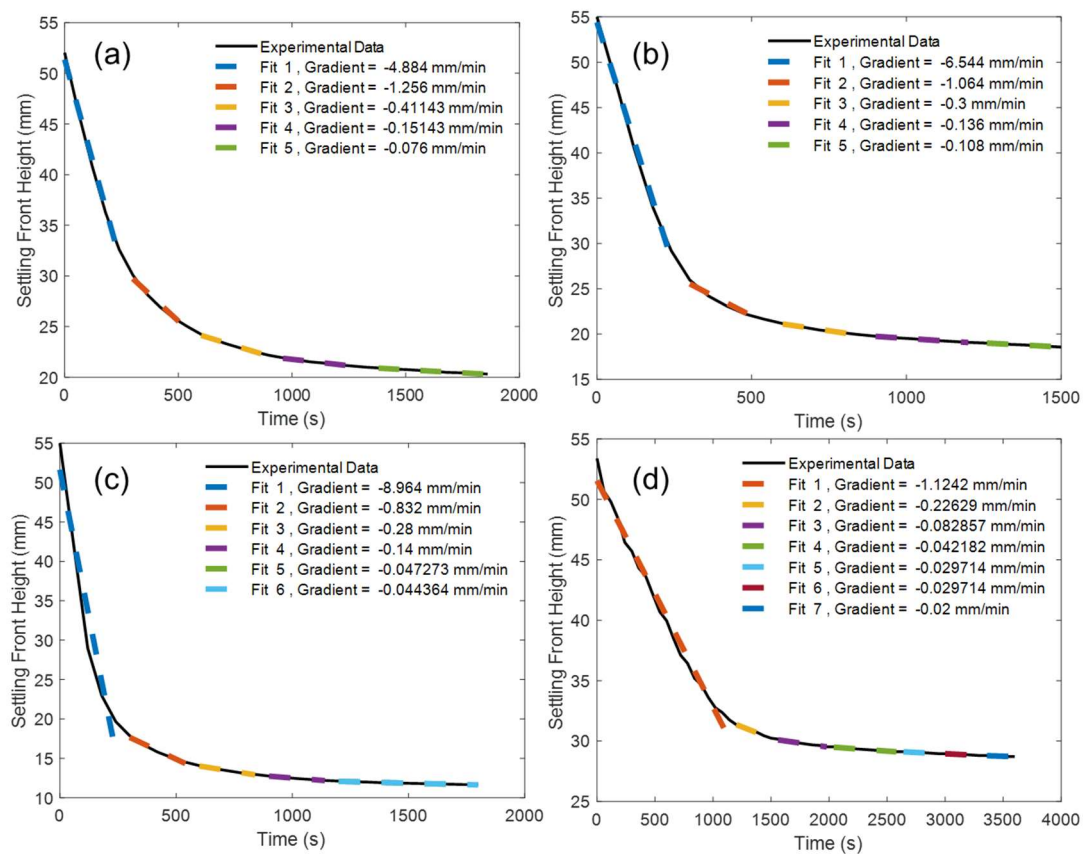

**Figure S4: Settling curve data for coagulated adsorbents including multiple zone linear fits; a) modified bentonite, b) talc, c) calcium carbonate. Also shown is d) iron hydroxide floc only.**

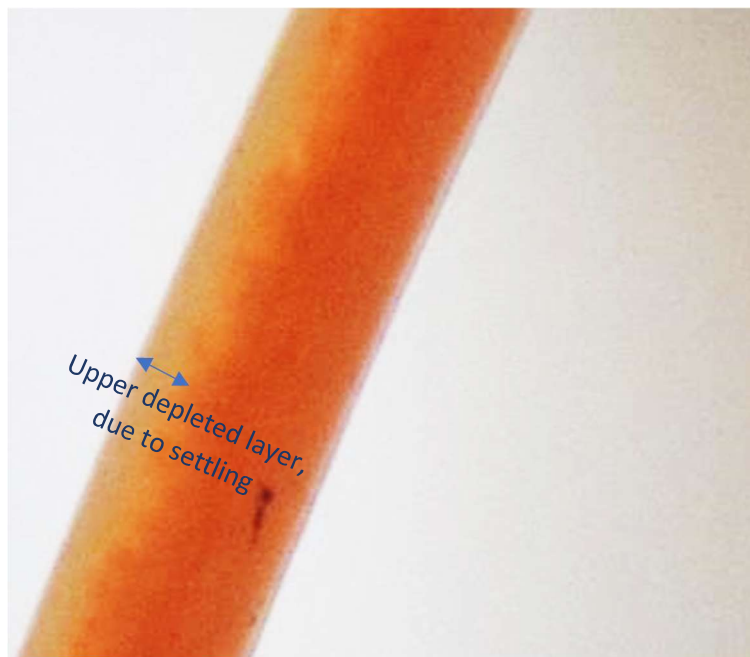

**Figure S5: Outlet flow from the agitated tube reactor after 90 min of operation.**

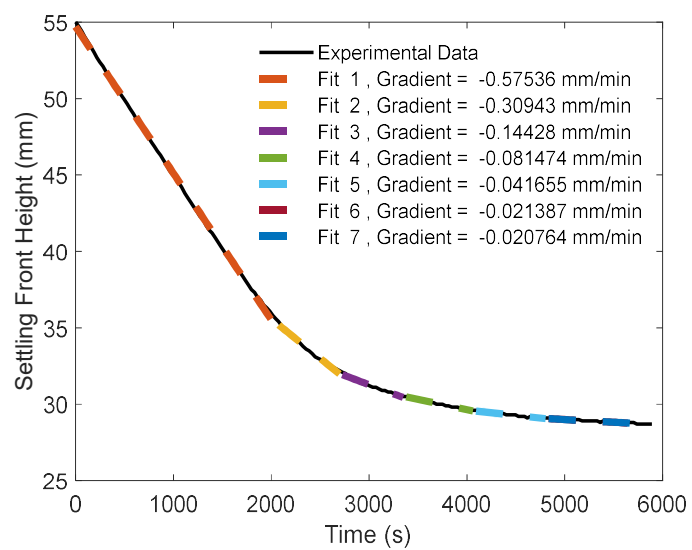

**Figure S6: Settling curve for coagulated calcium carbonate samples obtained from the ATR after 90 min of operation (using a 15 min reactor residence time). Includes multizonal linear fits.**
